# Supplementary material for: ZNF703 promotes tumor progression in ovarian cancer by interacting with HE4 and epigenetically regulating PEA15
Source: Springer Nature journal article supplement (doi:10.1186/s13046-020-01770-0), 2020-11-27
Supplement: MOESM1 [file 18635054]

**Table S1 The correlation between ZNF703 and HE4 expression in ovarian cancer (n=98)**

| ZNF703 | HE4 |    |    |     | case |
|--------|-----|----|----|-----|------|
|        | -   | +  | ++ | +++ |      |
| -      | 5   | 2  | 4  | 4   | 15   |
| +      | 4   | 7  | 2  | 11  | 24   |
| ++     | 2   | 3  | 10 | 13  | 28   |
| +++    | 3   | 6  | 2  | 20  | 31   |
| case   | 14  | 18 | 18 | 48  | 98   |

**a**

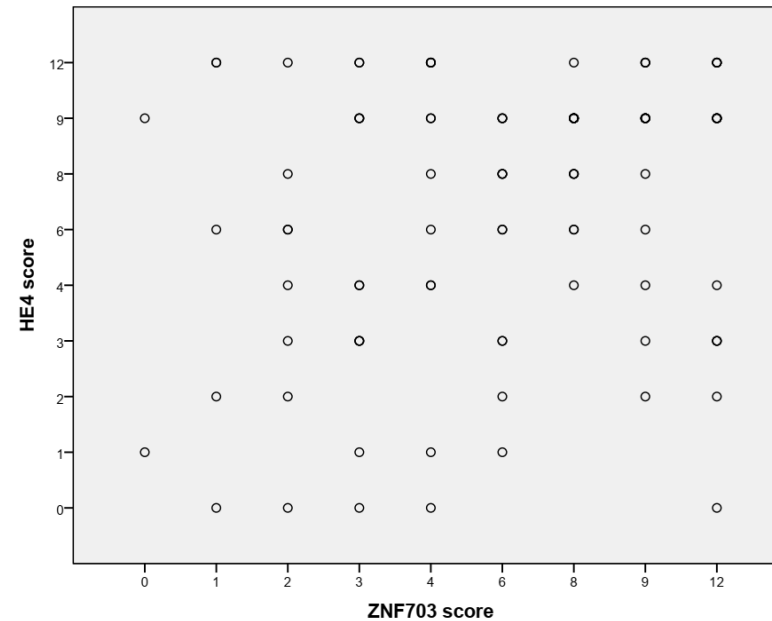

Spearman correlation coefficient  $R_s=0.213$ ,  $P=0.035$

**b**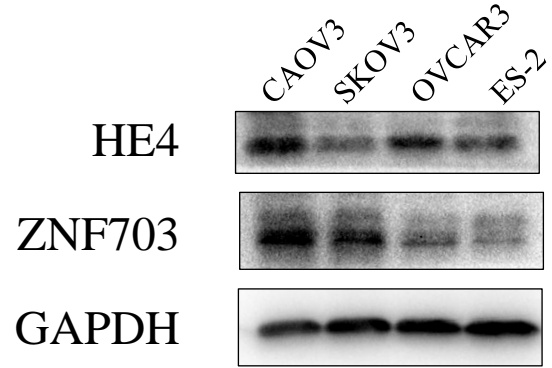**d**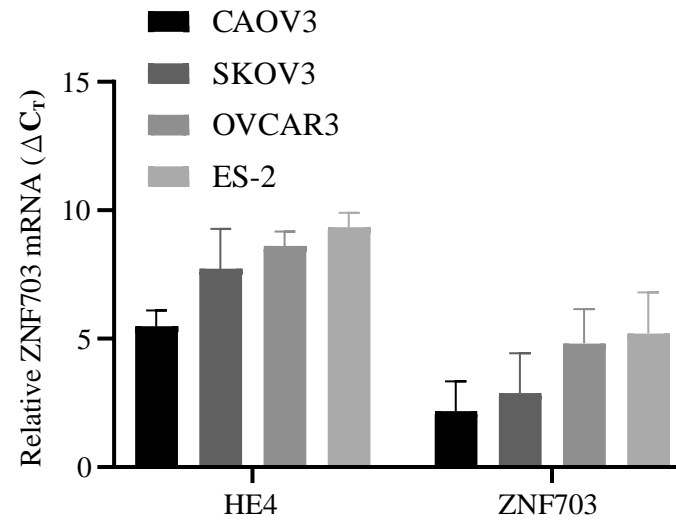**c**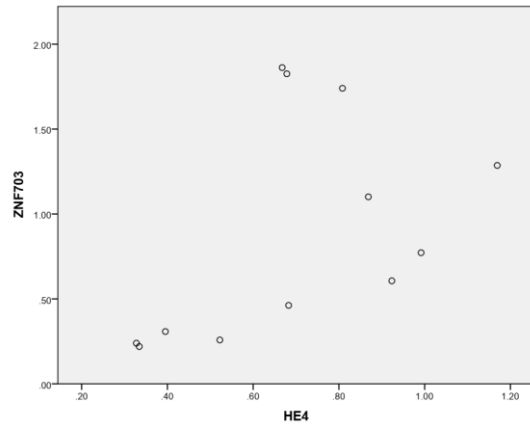

Spearman correlation coefficient  $R_s=0.552$ ,  $P=0.063$

**e**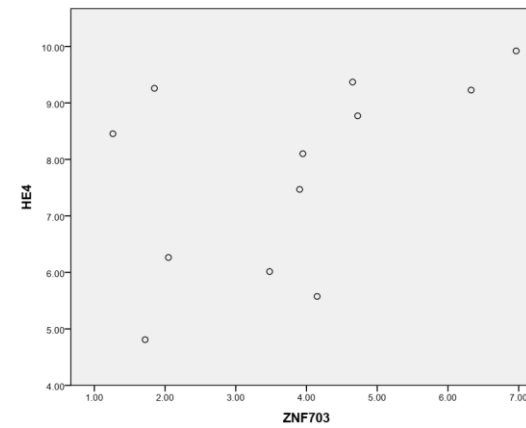

Spearman correlation coefficient  $R_s=0.510$ ,  $P=0.090$
