# Supplementary material for: ZNF703 promotes tumor progression in ovarian cancer by interacting with HE4 and epigenetically regulating PEA15
Source: Springer Nature journal article supplement (doi:10.1186/s13046-020-01770-0), 2020-11-27

**a**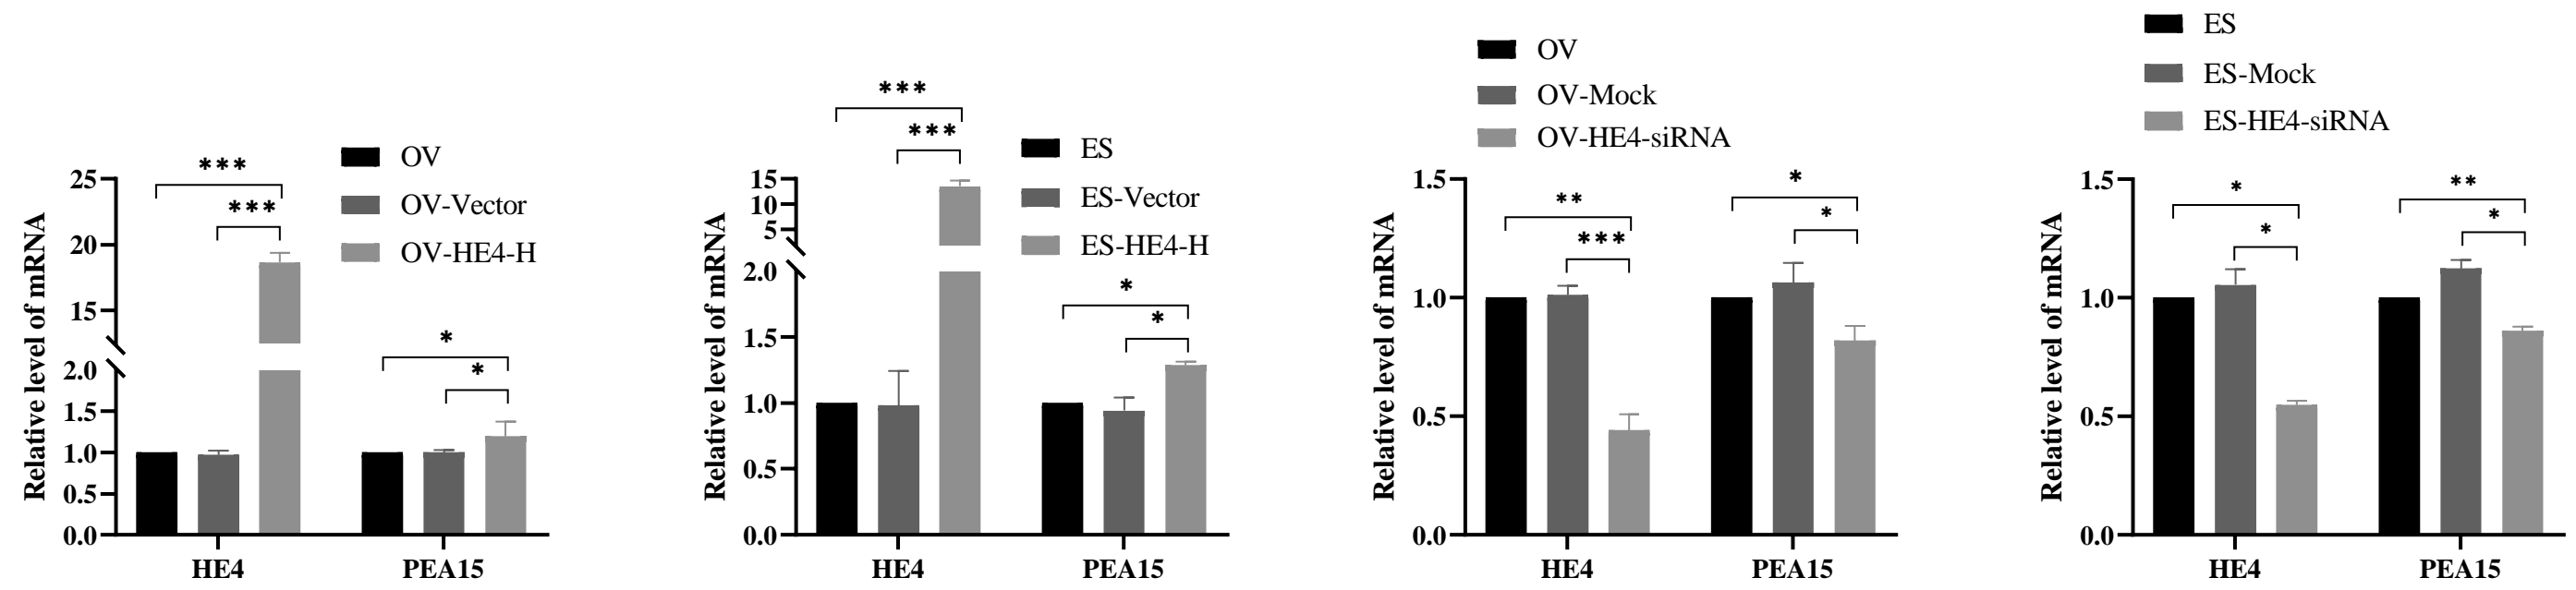**b**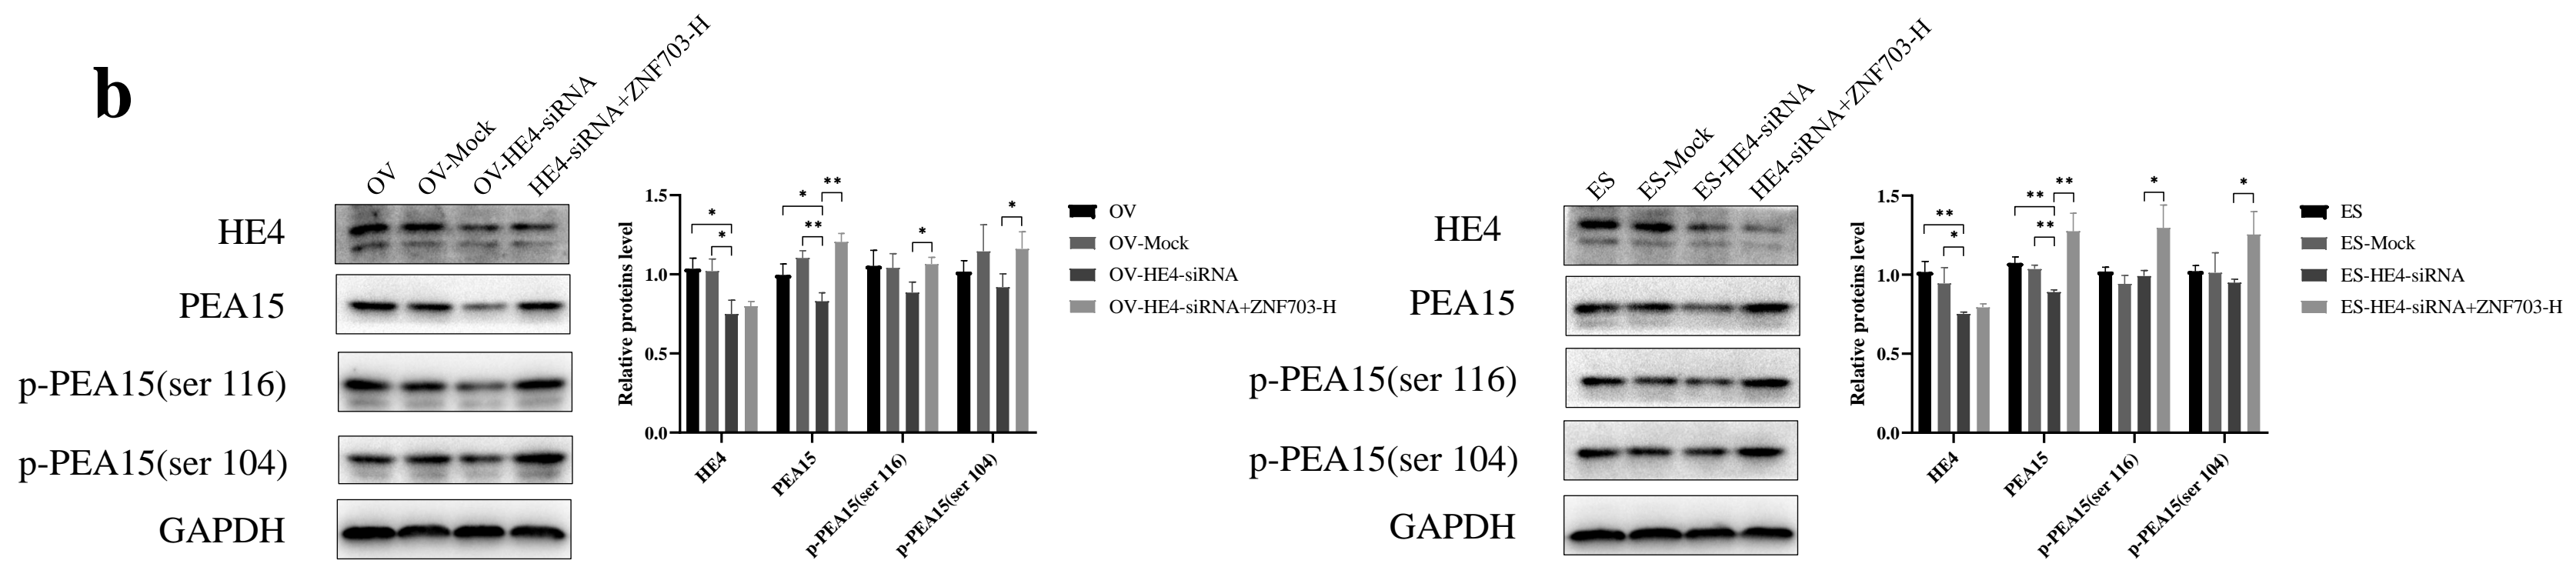**c**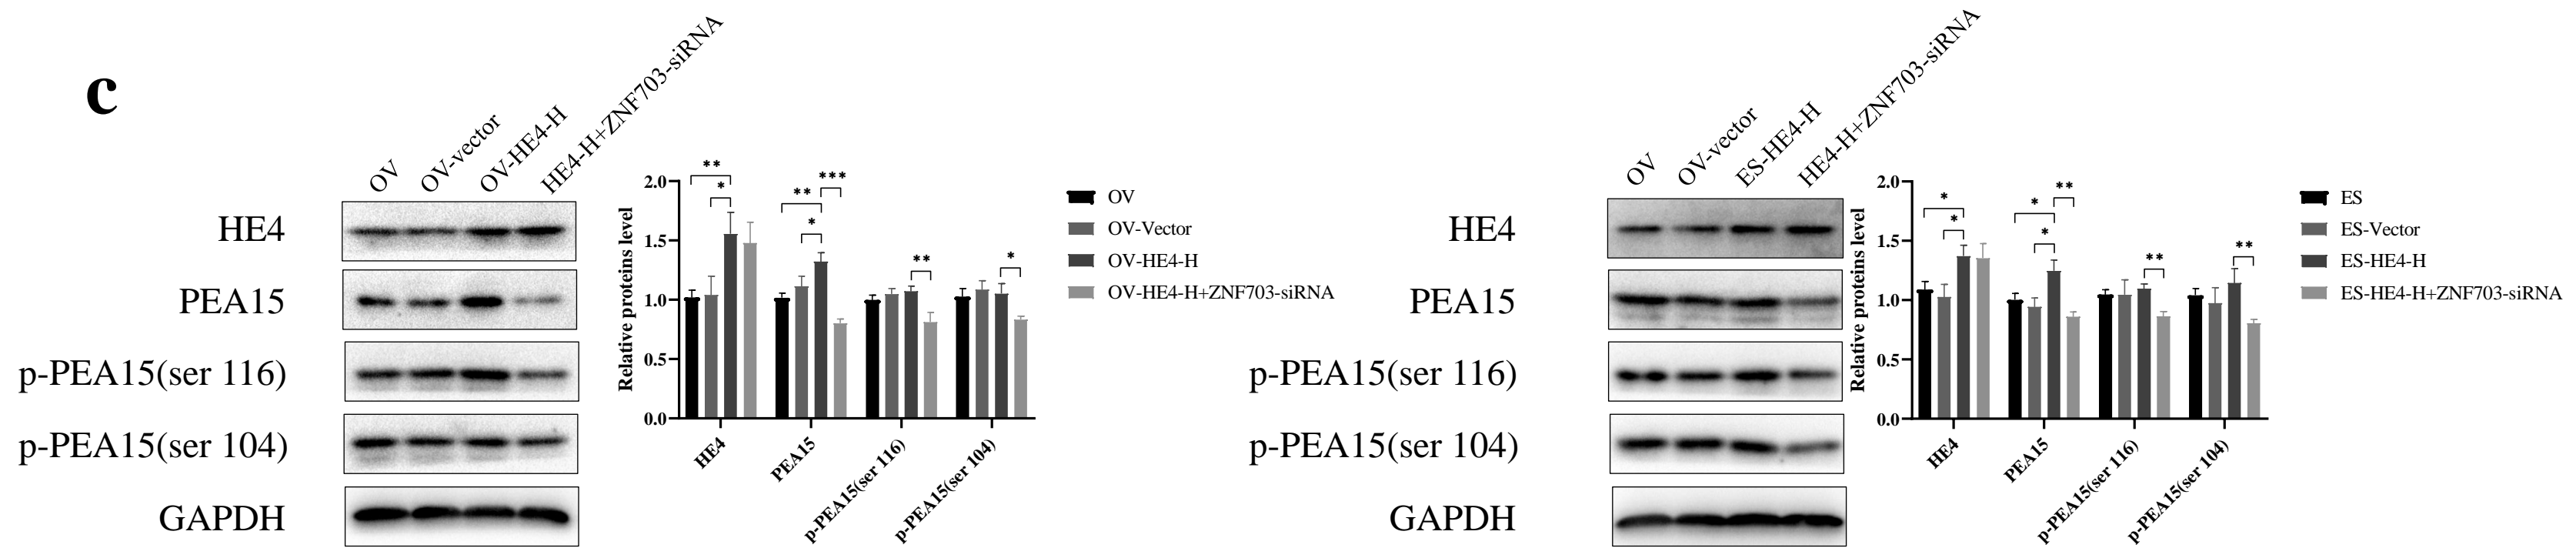

Supplement: MOESM4 [file 18635054]
