# Supplementary material for: ZNF703 promotes tumor progression in ovarian cancer by interacting with HE4 and epigenetically regulating PEA15
Source: Springer Nature journal article supplement (doi:10.1186/s13046-020-01770-0), 2020-11-27
Supplement: MOESM5 [file 18635054]

**a**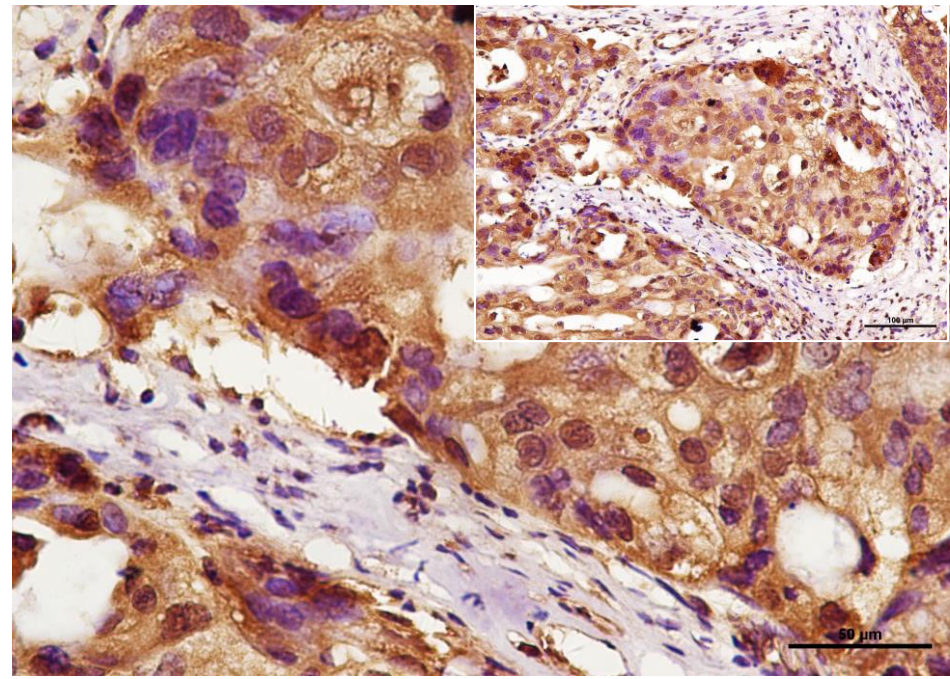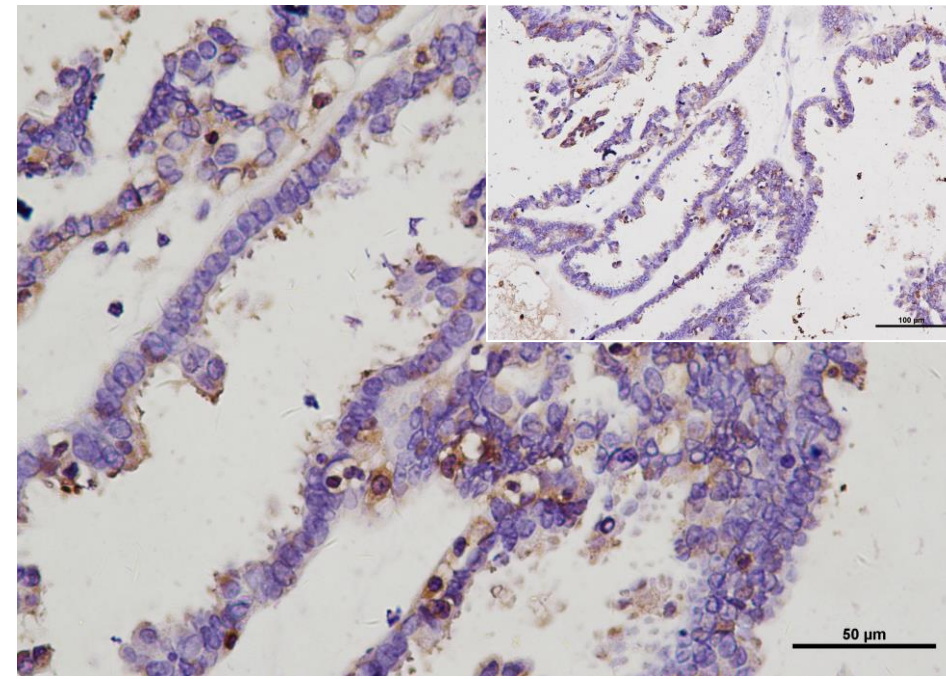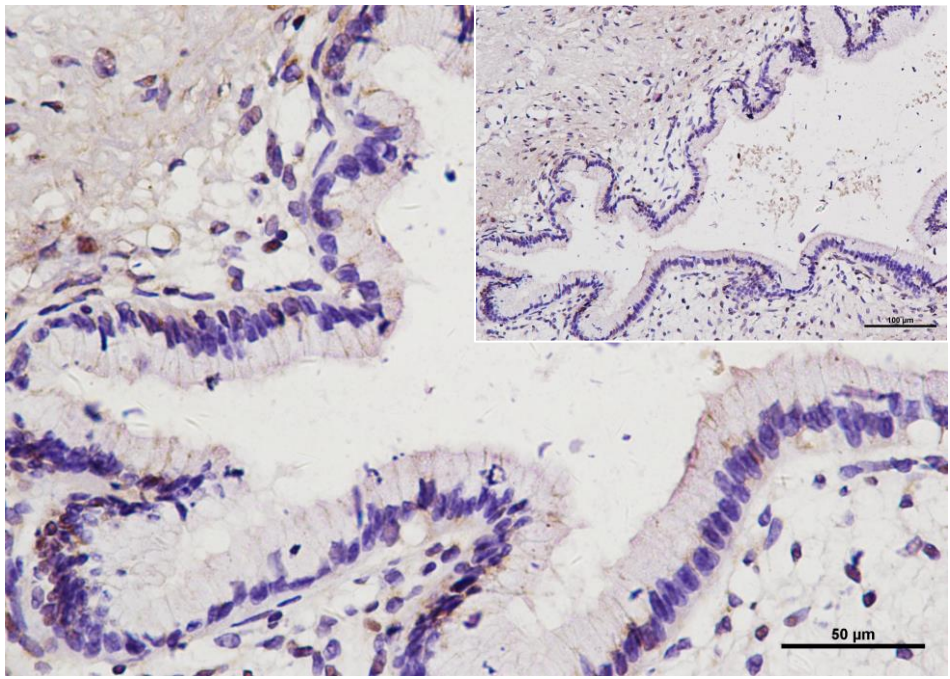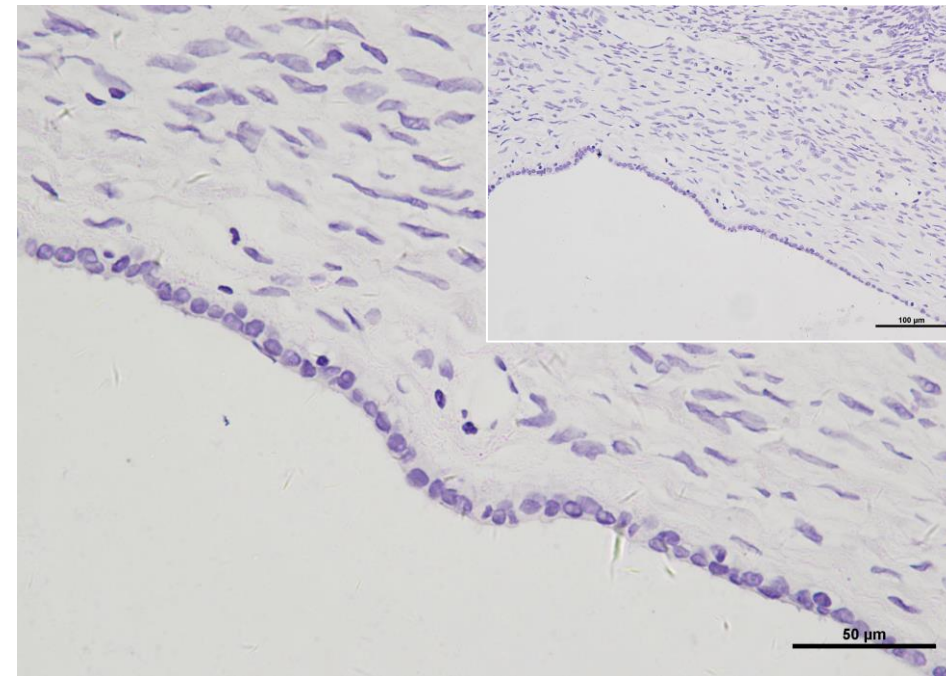**b**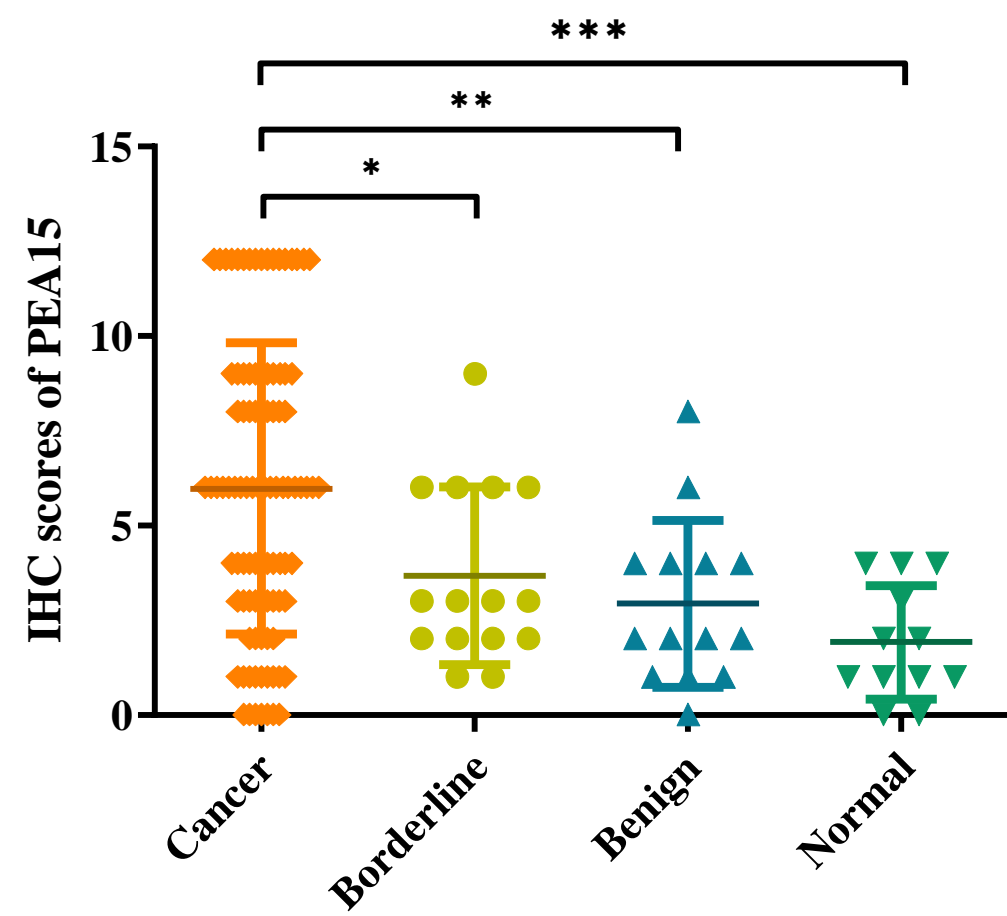**c**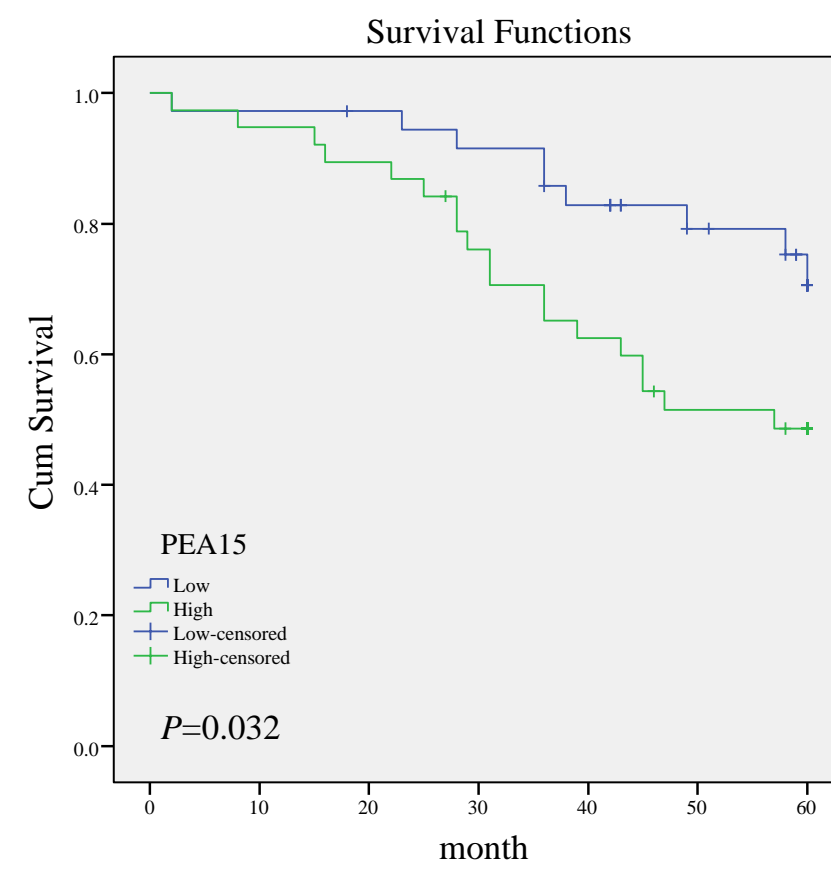

**Table S2 Expression of PEA15 in different types of ovarian tissue**

| Group      | Cases | Low |    | High |     | Positive rate(%)    | High Positive rate(%) |
|------------|-------|-----|----|------|-----|---------------------|-----------------------|
|            |       | -   | +  | ++   | +++ |                     |                       |
| Malignant  | 98    | 21  | 20 | 29   | 28  | 78.6 <sup>a,b</sup> | 58.2 <sup>c,d</sup>   |
| Borderline | 15    | 6   | 4  | 4    | 1   | 60 <sup>e,f</sup>   | 33.3 <sup>g,h</sup>   |
| Benign     | 14    | 8   | 4  | 2    | 0   | 42.9                | 14.3                  |
| Normal     | 12    | 8   | 4  | 0    | 0   | 33.3                | 0                     |

Note: a, malignant vs. benign (\*\*,  $P=0.008$ ); b, malignant vs. normal (\*\*\*,  $P=0.002$ ); c, malignant vs. benign (\*\*\*,  $P=0.002$ ); d, malignant vs. normal (\*\*\*,  $P < 0.001$ ); e, borderline vs. benign ( $P = 0.356$ ); f, borderline vs. normal ( $P = 0.168$ ); g, borderline vs. benign ( $P = 0.390$ ); h, borderline vs. normal (\*,  $P = 0.047$ ).

**Table S3 The correlation between ZNF703 and PEA15 expression in ovarian cancer (n=98)**

| ZNF703      | PEA15 |    |    |     | case |
|-------------|-------|----|----|-----|------|
|             | -     | +  | ++ | +++ |      |
| -           | 3     | 6  | 3  | 3   | 15   |
| +           | 5     | 9  | 6  | 4   | 24   |
| ++          | 7     | 4  | 9  | 8   | 28   |
| +++         | 6     | 1  | 11 | 13  | 31   |
| <b>case</b> | 21    | 20 | 29 | 28  | 98   |

**d**

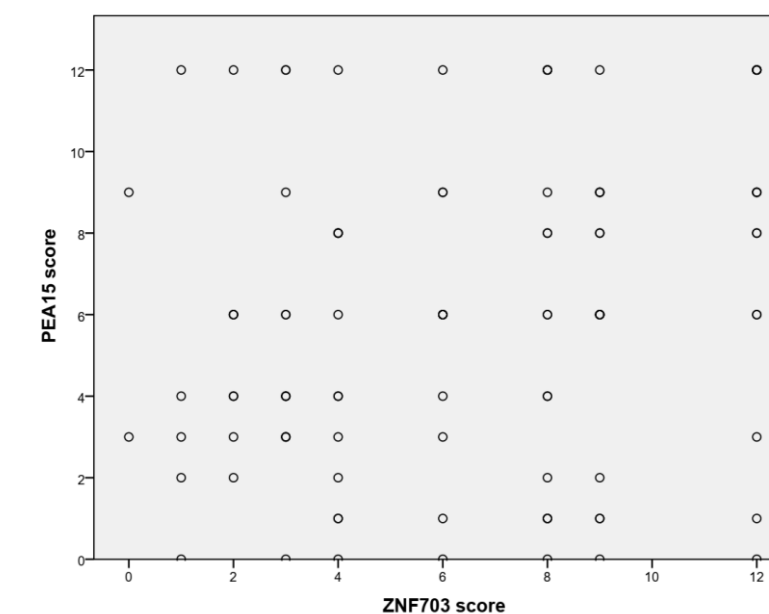

Spearman correlation coefficient  $R_s=0.237$ ,  $P=0.019$

**Table S4 The correlation between HE4 and PEA15 expression in ovarian cancer (n=98)**

| HE4         | PEA15 |    |    |     | case |
|-------------|-------|----|----|-----|------|
|             | -     | +  | ++ | +++ |      |
| -           | 5     | 3  | 3  | 3   | 14   |
| +           | 2     | 8  | 6  | 2   | 18   |
| ++          | 4     | 3  | 9  | 2   | 18   |
| +++         | 10    | 6  | 11 | 21  | 48   |
| <b>case</b> | 21    | 20 | 29 | 28  | 98   |

**e**

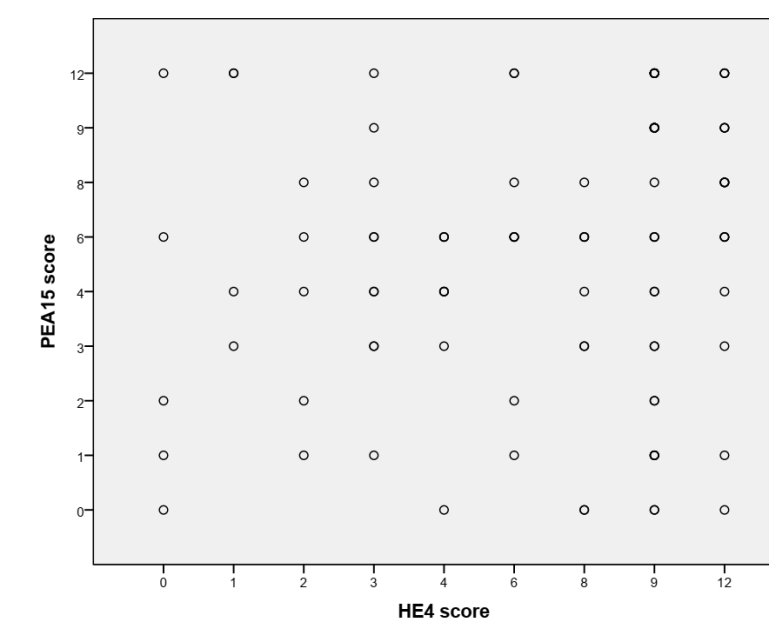

Spearman correlation coefficient  $R_s=0.203$ ,  $P=0.045$
